# Supplementary material
Source: PubMed Central journal article supplement (PMC3698246)
Supplement: NIHMS482937-supplement-01.pdf [file NIHMS482937-supplement-01.pdf]

## SUPPLEMENTAL

**Table S1:** Negative selection on disease categories. Each disease category is represented by four lines of data. Each line has the population (African American/European American), annotation (conserved non-coding [CNC]/coding sequence [CDS]), the number of genes associated with that disease category for which we have data, the number of genes excluding all disease categories for which we have data, the mean probability of negative selection across genes associated with the disease category, the mean probability of negative selection across genes excluding all disease categories, and the Mann-Whitney U p-value comparing the distributions of the probability of negative selection across genes associated with the disease category versus other genes. P-values that are significant at the 0.05 level are in bold.

|                       | pop       | data       | #Assoc.    | Other       | meanAssoc        | meanOther        | p-value        |
|-----------------------|-----------|------------|------------|-------------|------------------|------------------|----------------|
| Aging                 | AA        | CNC        | 24         | 7388        | 0.3265958        | 0.3237955        | 0.2325         |
|                       | AA        | CDS        | 23         | 6358        | 0.5557435        | 0.5191416        | 0.1582         |
|                       | CA        | CNC        | 24         | 7155        | 0.3305875        | 0.329751         | 0.2628         |
|                       | CA        | CDS        | 25         | 6160        | 0.611008         | 0.5676958        | 0.1655         |
| <b>Cancer</b>         | <b>AA</b> | <b>CNC</b> | <b>173</b> | <b>7388</b> | <b>0.3394023</b> | <b>0.3237955</b> | <b>0.04529</b> |
|                       | AA        | CDS        | 179        | 6358        | 0.5228251        | 0.5191416        | 0.4443         |
|                       | <b>CA</b> | <b>CNC</b> | <b>167</b> | <b>7155</b> | <b>0.3636581</b> | <b>0.329751</b>  | <b>0.00352</b> |
|                       | CA        | CDS        | 180        | 6160        | 0.5773372        | 0.5676958        | 0.298          |
| <b>Cardiovascular</b> | AA        | CNC        | 201        | 7388        | 0.3282109        | 0.3237955        | 0.358          |
|                       | <b>AA</b> | <b>CDS</b> | <b>219</b> | <b>6358</b> | <b>0.549905</b>  | <b>0.5191416</b> | <b>0.02862</b> |
|                       | CA        | CNC        | 193        | 7155        | 0.3330347        | 0.329751         | 0.5163         |
|                       | CA        | CDS        | 220        | 6160        | 0.5893723        | 0.5676958        | 0.09786        |
| Chemical Dependency   | AA        | CNC        | 41         | 7388        | 0.3458439        | 0.3237955        | 0.109          |
|                       | AA        | CDS        | 30         | 6358        | 0.4423467        | 0.5191416        | 0.9755         |
|                       | CA        | CNC        | 38         | 7155        | 0.3224895        | 0.329751         | 0.4995         |
|                       | CA        | CDS        | 31         | 6160        | 0.5411226        | 0.5676958        | 0.766          |
| <b>Developmental</b>  | AA        | CNC        | 48         | 7388        | 0.3366521        | 0.3237955        | 0.1805         |

|                        |           |            |            |             |                  |                  |                |
|------------------------|-----------|------------|------------|-------------|------------------|------------------|----------------|
|                        | AA        | CDS        | 38         | 6358        | 0.5402158        | 0.5191416        | 0.2671         |
|                        | CA        | CNC        | 47         | 7155        | 0.3592085        | 0.329751         | 0.1082         |
|                        | <b>CA</b> | <b>CDS</b> | <b>42</b>  | <b>6160</b> | <b>0.6416595</b> | <b>0.5676958</b> | <b>0.00902</b> |
| Hematological          | AA        | CNC        | 24         | 7388        | 0.3427           | 0.3237955        | 0.09617        |
|                        | AA        | CDS        | 32         | 6358        | 0.46665          | 0.5191416        | 0.9219         |
|                        | CA        | CNC        | 20         | 7155        | 0.316215         | 0.329751         | 0.8341         |
|                        | CA        | CDS        | 31         | 6160        | 0.4790323        | 0.5676958        | 0.9956         |
| Immune                 | AA        | CNC        | 169        | 7388        | 0.3211533        | 0.3237955        | 0.3441         |
|                        | AA        | CDS        | 198        | 6358        | 0.5317793        | 0.5191416        | 0.1912         |
|                        | CA        | CNC        | 165        | 7155        | 0.3414776        | 0.329751         | 0.05543        |
|                        | CA        | CDS        | 192        | 6160        | 0.5686474        | 0.5676958        | 0.5519         |
| Infection              | AA        | CNC        | 49         | 7388        | 0.3055           | 0.3237955        | 0.574          |
|                        | AA        | CDS        | 64         | 6358        | 0.5347484        | 0.5191416        | 0.303          |
|                        | CA        | CNC        | 49         | 7155        | 0.3555531        | 0.329751         | 0.07868        |
|                        | CA        | CDS        | 61         | 6160        | 0.5717836        | 0.5676958        | 0.5154         |
| <b>Metabolic</b>       | AA        | CNC        | 237        | 7388        | 0.3333046        | 0.3237955        | 0.1513         |
|                        | <b>AA</b> | <b>CDS</b> | <b>249</b> | <b>6358</b> | <b>0.5379739</b> | <b>0.5191416</b> | <b>0.04641</b> |
|                        | <b>CA</b> | <b>CNC</b> | <b>231</b> | <b>7155</b> | <b>0.3581805</b> | <b>0.329751</b>  | <b>0.0161</b>  |
|                        | <b>CA</b> | <b>CDS</b> | <b>245</b> | <b>6160</b> | <b>0.5910837</b> | <b>0.5676958</b> | <b>0.03799</b> |
| Neurological           | AA        | CNC        | 120        | 7388        | 0.3113           | 0.3237955        | 0.8659         |
|                        | AA        | CDS        | 100        | 6358        | 0.518476         | 0.5191416        | 0.5738         |
|                        | CA        | CNC        | 113        | 7155        | 0.3291496        | 0.329751         | 0.6071         |
|                        | CA        | CDS        | 97         | 6160        | 0.5722299        | 0.5676958        | 0.5123         |
| <b>Other</b>           | AA        | CNC        | 219        | 7388        | 0.3244265        | 0.3237955        | 0.4513         |
|                        | <b>AA</b> | <b>CDS</b> | <b>225</b> | <b>6358</b> | <b>0.5389133</b> | <b>0.5191416</b> | <b>0.04889</b> |
|                        | CA        | CNC        | 206        | 7155        | 0.3275316        | 0.329751         | 0.3597         |
|                        | CA        | CDS        | 219        | 6160        | 0.5750078        | 0.5676958        | 0.2851         |
| <b>Pharmacogenomic</b> | AA        | CNC        | 56         | 7388        | 0.3357036        | 0.3237955        | 0.2611         |
|                        | AA        | CDS        | 58         | 6358        | 0.5280845        | 0.5191416        | 0.3902         |
|                        | <b>CA</b> | <b>CNC</b> | <b>50</b>  | <b>7155</b> | <b>0.368852</b>  | <b>0.329751</b>  | <b>0.01569</b> |
|                        | CA        | CDS        | 57         | 6160        | 0.5720702        | 0.5676958        | 0.496          |
| Psychological          | AA        | CNC        | 153        | 7388        | 0.3149144        | 0.3237955        | 0.6817         |
|                        | AA        | CDS        | 112        | 6358        | 0.526833         | 0.5191416        | 0.3743         |
|                        | CA        | CNC        | 151        | 7155        | 0.3359338        | 0.329751         | 0.4872         |
|                        | CA        | CDS        | 116        | 6160        | 0.5834086        | 0.5676958        | 0.3154         |
| Renal                  | AA        | CNC        | 57         | 7388        | 0.3331719        | 0.3237955        | 0.1028         |
|                        | AA        | CDS        | 68         | 6358        | 0.5224221        | 0.5191416        | 0.4384         |
|                        | CA        | CNC        | 54         | 7155        | 0.3232741        | 0.329751         | 0.5621         |
|                        | CA        | CDS        | 66         | 6160        | 0.5691076        | 0.5676958        | 0.436          |
| Reproduction           | AA        | CNC        | 57         | 7388        | 0.3228404        | 0.3237955        | 0.1809         |
|                        | AA        | CDS        | 69         | 6358        | 0.5317464        | 0.5191416        | 0.3314         |
|                        | CA        | CNC        | 56         | 7155        | 0.3540446        | 0.329751         | 0.1071         |

|         |    |     |    |      |           |           |        |
|---------|----|-----|----|------|-----------|-----------|--------|
|         | CA | CDS | 68 | 6160 | 0.5800721 | 0.5676958 | 0.3279 |
| Unknown | AA | CNC | 47 | 7388 | 0.3103128 | 0.3237955 | 0.5766 |
|         | AA | CDS | 46 | 6358 | 0.5116196 | 0.5191416 | 0.6982 |
|         | CA | CNC | 43 | 7155 | 0.3425163 | 0.329751  | 0.1793 |
|         | CA | CDS | 49 | 6160 | 0.5850857 | 0.5676958 | 0.3852 |
| Vision  | AA | CNC | 32 | 7388 | 0.3017906 | 0.3237955 | 0.6987 |
|         | AA | CDS | 36 | 6358 | 0.4809944 | 0.5191416 | 0.8748 |
|         | CA | CNC | 30 | 7155 | 0.33131   | 0.329751  | 0.3997 |
|         | CA | CDS | 37 | 6160 | 0.5669081 | 0.5676958 | 0.5373 |

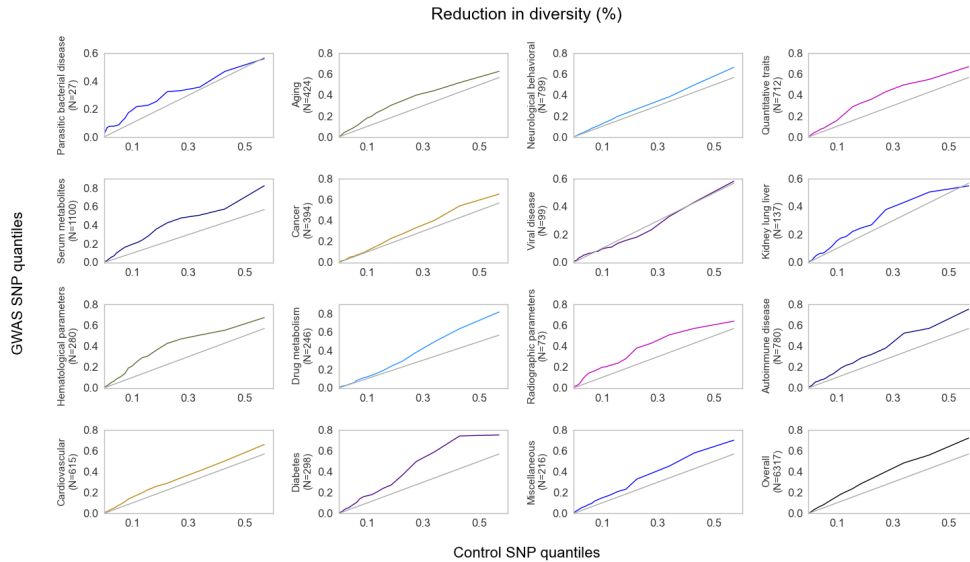

Figure S1. QQ-plots for the effect of background selection in each of 15 complex disease and trait categories (and overall). For each panel, an independent set of 1000 controls sets of SNPs were created to reflect the number of SNPs associated with that particular category as well as the frequency of those alleles and their distance to nearest gene. To provide even smoothness across sample sizes, we have discretized the plot into five percentile intervals (vigintiles).
